# Supplementary material
Source: publisher figshare collection journal article supplement (https://tandf.figshare.com/articles/dataset/_/6140048)
Supplement: Supplementary file 1 [file 1]

## कार्निया फार्म –IV

### कार्नियल अस्पष्टता संबंधी समुदाय आधारित एपिडिमियोलॉजिकल अध्ययन (Corneal Opacity Rural Epidemiological Study)

| IDENTIFICATION DATA<br>पहचान तथ्य                                                   | RESPONSE CATEGORIES<br>उत्तरदाता श्रेणी                                     | FOR OFFICE USE ONLY<br>केवल कार्यालय हेतु                                                                                                                                          |
|-------------------------------------------------------------------------------------|-----------------------------------------------------------------------------|------------------------------------------------------------------------------------------------------------------------------------------------------------------------------------|
| Name of Village<br>ग्राम का नाम                                                     | _____                                                                       | [ ] [ ]                                                                                                                                                                            |
| Cluster Code<br>समूह संख्या                                                         | _____                                                                       | [ ] [ ]                                                                                                                                                                            |
| Household ID<br>मकान को दिया गया नम्बर                                              | <b>Study House No.</b> _____                                                | [ ] [ ] [ ] [ ] [ ] [ ] [ ] [ ]<br>Location ID (1) + Cluster ID (2)+ HH No. (3)<br>जगह संख्या (1) + समूह संख्या (2)+ मकान संख्या (3)                                               |
| Interviewer Name and Code<br>साक्षात्कारकर्ता का नाम एवं कोड                        | _____ [ ] [ ]                                                               | [ ] [ ] [ ]                                                                                                                                                                        |
| Respondent Name<br>उत्तरदाता का नाम                                                 | _____                                                                       | _____                                                                                                                                                                              |
| Person Unique ID No.<br><b>(From Enumeration Form)</b><br>व्यक्ति को दिया गया नम्बर | Person Number. _____<br><br>व्यक्ति का नम्बर _____                          | [ ] [ ] [ ] [ ] [ ] [ ] [ ] [ ] [ ] [ ]<br>Location ID (1)+ Cluster ID (2)+ HH No (3) +<br>Person No(2)<br>जगह संख्या (1) + समूह संख्या (2)+ मकान संख्या (3)<br>+ सदस्य संख्या (2) |
| Gender<br>लिंग                                                                      | Male=1;                  Female=2<br>पुरुष = 1;                  स्त्री = 2 | [ ]                                                                                                                                                                                |
| Age<br>उम्र                                                                         | _____ (In completed years)<br>(निकटतम वर्ष में )                            | [ ] [ ]                                                                                                                                                                            |
| Date of Interview<br>साक्षात्कार की तिथि                                            | <b>(dd/mm/yyyy)</b> _ _ / _ _ / _ _ _ _                                     | [ ] [ ] [ ] - [ ] [ ] [ ] - [ ] [ ] [ ] [ ]                                                                                                                                        |

## आँखों की बिमारी संबंधित जानकारी, स्वभाव एवं व्यवहार का मूल्यांकन

| S.No. | Question                                                                                                                                                                                     | Response | Marking Guide                                                                                                                                                                                                                                                                                                                                                                                                                                                                             |
|-------|----------------------------------------------------------------------------------------------------------------------------------------------------------------------------------------------|----------|-------------------------------------------------------------------------------------------------------------------------------------------------------------------------------------------------------------------------------------------------------------------------------------------------------------------------------------------------------------------------------------------------------------------------------------------------------------------------------------------|
| 1.    | <p>What are the common symptoms of eye diseases?<br/>(Multiple response possible)</p> <p>आप के अनुसार आँखों की बिमारियों के क्या-क्या लक्षण हो सकते हैं ?<br/>(एक से अधिक उत्तर संभव है)</p> |          | <p>a. सर दर्द (Headache )</p> <p>b. आँखों का लाल होना (Redness)</p> <p>c. आँखों से पानी आना (Watering)</p> <p>d. आँखों से कीचड़ आना (Ocular discharge)</p> <p>e. आँखों में जलन (Burning of eyes)</p> <p>f. खुजली होना ( Itching)</p> <p>g. आँखों में किरकिरापन/रगड़न होना<br/>(Foreign body sensation)</p> <p>h. आँखों में दर्द होना (Eyeache)</p> <p>i. धुंधलापन (Blurring of vision)</p> <p>j. अन्य (Any other)</p> <p>k. नहीं मालूम (Do not know)</p>                                  |
| 2.    | <p>Which eye diseases have you heard of?<br/>(Multiple response possible)</p> <p>आपने आँखों की कौन -कौन सी बिमारियों के बारे में सुना है?<br/>(एक से अधिक उत्तर संभव है)</p>                 |          | <p>a. आईफ्लू (Eye flu), संक्रमण (Conjunctivitis)</p> <p>b. दृष्टिदोष (Refractive error)</p> <p>c. मोतियाबिन्द (Cataract)</p> <p>d. रोहे/कुर्कुरे/परबाल (Trachoma/Trichiasis)</p> <p>e. काला मोतिया (Glaucoma)</p> <p>f. भेगापन (Squint)</p> <p>g. फूला (Corneal ulcer)</p> <p>h. रतौंधी (Night Blindness)</p> <p>i. विटामिन 'A' की कमी (विटामिन 'A' डिफिसिएन्सी)<br/>(Vitamin A deficiency)</p> <p>j. नखूना (Pterygium)</p> <p>k. अन्य (Any other)</p> <p>l. नहीं मालूम (Do not know)</p> |

| 3.                                                      | <p>Have you heard about the following eye diseases?<br/>क्या आप ने आँखों की इन बिमारियों के बारे में सुना है?</p> <table border="0"> <thead> <tr> <th></th> <th>हाँ (Yes)</th> <th>नहीं (No)</th> </tr> </thead> <tbody> <tr> <td>a. आईफ्लू (Eye flu), संक्रमण (Conjunctivitis)</td> <td><input type="checkbox"/></td> <td><input type="checkbox"/></td> </tr> <tr> <td>b. दृष्टिदोष (Refractive error)</td> <td><input type="checkbox"/></td> <td><input type="checkbox"/></td> </tr> <tr> <td>c. मोतियाबिन्द (Cataract)</td> <td><input type="checkbox"/></td> <td><input type="checkbox"/></td> </tr> <tr> <td>d. रोहे/कुर्कुरे/परबाल (Trachoma/Trichiasis)</td> <td><input type="checkbox"/></td> <td><input type="checkbox"/></td> </tr> <tr> <td>e. काला मोतिया (Glaucoma)</td> <td><input type="checkbox"/></td> <td><input type="checkbox"/></td> </tr> <tr> <td>f. भेगापन (Squint)</td> <td><input type="checkbox"/></td> <td><input type="checkbox"/></td> </tr> <tr> <td>g. फूला (Corneal ulcer)</td> <td><input type="checkbox"/></td> <td><input type="checkbox"/></td> </tr> <tr> <td>h. आँख की पारदर्शी झिल्ली पर सफेद दाग (Corneal Opacity)</td> <td><input type="checkbox"/></td> <td><input type="checkbox"/></td> </tr> <tr> <td>i. रतौंधी (Night Blindness)</td> <td><input type="checkbox"/></td> <td><input type="checkbox"/></td> </tr> <tr> <td>j. विटामिन 'A' की कमी (Vitamin A deficiency )</td> <td><input type="checkbox"/></td> <td><input type="checkbox"/></td> </tr> <tr> <td>k. नखुना (Pterygium)</td> <td><input type="checkbox"/></td> <td><input type="checkbox"/></td> </tr> </tbody> </table> |                          |                                                                                                                                                                                                                                                                                                                       |  | हाँ (Yes) | नहीं (No) | a. आईफ्लू (Eye flu), संक्रमण (Conjunctivitis) | <input type="checkbox"/> | <input type="checkbox"/> | b. दृष्टिदोष (Refractive error) | <input type="checkbox"/> | <input type="checkbox"/> | c. मोतियाबिन्द (Cataract) | <input type="checkbox"/> | <input type="checkbox"/> | d. रोहे/कुर्कुरे/परबाल (Trachoma/Trichiasis) | <input type="checkbox"/> | <input type="checkbox"/> | e. काला मोतिया (Glaucoma) | <input type="checkbox"/> | <input type="checkbox"/> | f. भेगापन (Squint) | <input type="checkbox"/> | <input type="checkbox"/> | g. फूला (Corneal ulcer) | <input type="checkbox"/> | <input type="checkbox"/> | h. आँख की पारदर्शी झिल्ली पर सफेद दाग (Corneal Opacity) | <input type="checkbox"/> | <input type="checkbox"/> | i. रतौंधी (Night Blindness) | <input type="checkbox"/> | <input type="checkbox"/> | j. विटामिन 'A' की कमी (Vitamin A deficiency ) | <input type="checkbox"/> | <input type="checkbox"/> | k. नखुना (Pterygium) | <input type="checkbox"/> | <input type="checkbox"/> |
|---------------------------------------------------------|-------------------------------------------------------------------------------------------------------------------------------------------------------------------------------------------------------------------------------------------------------------------------------------------------------------------------------------------------------------------------------------------------------------------------------------------------------------------------------------------------------------------------------------------------------------------------------------------------------------------------------------------------------------------------------------------------------------------------------------------------------------------------------------------------------------------------------------------------------------------------------------------------------------------------------------------------------------------------------------------------------------------------------------------------------------------------------------------------------------------------------------------------------------------------------------------------------------------------------------------------------------------------------------------------------------------------------------------------------------------------------------------------------------------------------------------------------------------------------------------------------------------------------------------------------------------------------------------------------------------------------------|--------------------------|-----------------------------------------------------------------------------------------------------------------------------------------------------------------------------------------------------------------------------------------------------------------------------------------------------------------------|--|-----------|-----------|-----------------------------------------------|--------------------------|--------------------------|---------------------------------|--------------------------|--------------------------|---------------------------|--------------------------|--------------------------|----------------------------------------------|--------------------------|--------------------------|---------------------------|--------------------------|--------------------------|--------------------|--------------------------|--------------------------|-------------------------|--------------------------|--------------------------|---------------------------------------------------------|--------------------------|--------------------------|-----------------------------|--------------------------|--------------------------|-----------------------------------------------|--------------------------|--------------------------|----------------------|--------------------------|--------------------------|
|                                                         | हाँ (Yes)                                                                                                                                                                                                                                                                                                                                                                                                                                                                                                                                                                                                                                                                                                                                                                                                                                                                                                                                                                                                                                                                                                                                                                                                                                                                                                                                                                                                                                                                                                                                                                                                                           | नहीं (No)                |                                                                                                                                                                                                                                                                                                                       |  |           |           |                                               |                          |                          |                                 |                          |                          |                           |                          |                          |                                              |                          |                          |                           |                          |                          |                    |                          |                          |                         |                          |                          |                                                         |                          |                          |                             |                          |                          |                                               |                          |                          |                      |                          |                          |
| a. आईफ्लू (Eye flu), संक्रमण (Conjunctivitis)           | <input type="checkbox"/>                                                                                                                                                                                                                                                                                                                                                                                                                                                                                                                                                                                                                                                                                                                                                                                                                                                                                                                                                                                                                                                                                                                                                                                                                                                                                                                                                                                                                                                                                                                                                                                                            | <input type="checkbox"/> |                                                                                                                                                                                                                                                                                                                       |  |           |           |                                               |                          |                          |                                 |                          |                          |                           |                          |                          |                                              |                          |                          |                           |                          |                          |                    |                          |                          |                         |                          |                          |                                                         |                          |                          |                             |                          |                          |                                               |                          |                          |                      |                          |                          |
| b. दृष्टिदोष (Refractive error)                         | <input type="checkbox"/>                                                                                                                                                                                                                                                                                                                                                                                                                                                                                                                                                                                                                                                                                                                                                                                                                                                                                                                                                                                                                                                                                                                                                                                                                                                                                                                                                                                                                                                                                                                                                                                                            | <input type="checkbox"/> |                                                                                                                                                                                                                                                                                                                       |  |           |           |                                               |                          |                          |                                 |                          |                          |                           |                          |                          |                                              |                          |                          |                           |                          |                          |                    |                          |                          |                         |                          |                          |                                                         |                          |                          |                             |                          |                          |                                               |                          |                          |                      |                          |                          |
| c. मोतियाबिन्द (Cataract)                               | <input type="checkbox"/>                                                                                                                                                                                                                                                                                                                                                                                                                                                                                                                                                                                                                                                                                                                                                                                                                                                                                                                                                                                                                                                                                                                                                                                                                                                                                                                                                                                                                                                                                                                                                                                                            | <input type="checkbox"/> |                                                                                                                                                                                                                                                                                                                       |  |           |           |                                               |                          |                          |                                 |                          |                          |                           |                          |                          |                                              |                          |                          |                           |                          |                          |                    |                          |                          |                         |                          |                          |                                                         |                          |                          |                             |                          |                          |                                               |                          |                          |                      |                          |                          |
| d. रोहे/कुर्कुरे/परबाल (Trachoma/Trichiasis)            | <input type="checkbox"/>                                                                                                                                                                                                                                                                                                                                                                                                                                                                                                                                                                                                                                                                                                                                                                                                                                                                                                                                                                                                                                                                                                                                                                                                                                                                                                                                                                                                                                                                                                                                                                                                            | <input type="checkbox"/> |                                                                                                                                                                                                                                                                                                                       |  |           |           |                                               |                          |                          |                                 |                          |                          |                           |                          |                          |                                              |                          |                          |                           |                          |                          |                    |                          |                          |                         |                          |                          |                                                         |                          |                          |                             |                          |                          |                                               |                          |                          |                      |                          |                          |
| e. काला मोतिया (Glaucoma)                               | <input type="checkbox"/>                                                                                                                                                                                                                                                                                                                                                                                                                                                                                                                                                                                                                                                                                                                                                                                                                                                                                                                                                                                                                                                                                                                                                                                                                                                                                                                                                                                                                                                                                                                                                                                                            | <input type="checkbox"/> |                                                                                                                                                                                                                                                                                                                       |  |           |           |                                               |                          |                          |                                 |                          |                          |                           |                          |                          |                                              |                          |                          |                           |                          |                          |                    |                          |                          |                         |                          |                          |                                                         |                          |                          |                             |                          |                          |                                               |                          |                          |                      |                          |                          |
| f. भेगापन (Squint)                                      | <input type="checkbox"/>                                                                                                                                                                                                                                                                                                                                                                                                                                                                                                                                                                                                                                                                                                                                                                                                                                                                                                                                                                                                                                                                                                                                                                                                                                                                                                                                                                                                                                                                                                                                                                                                            | <input type="checkbox"/> |                                                                                                                                                                                                                                                                                                                       |  |           |           |                                               |                          |                          |                                 |                          |                          |                           |                          |                          |                                              |                          |                          |                           |                          |                          |                    |                          |                          |                         |                          |                          |                                                         |                          |                          |                             |                          |                          |                                               |                          |                          |                      |                          |                          |
| g. फूला (Corneal ulcer)                                 | <input type="checkbox"/>                                                                                                                                                                                                                                                                                                                                                                                                                                                                                                                                                                                                                                                                                                                                                                                                                                                                                                                                                                                                                                                                                                                                                                                                                                                                                                                                                                                                                                                                                                                                                                                                            | <input type="checkbox"/> |                                                                                                                                                                                                                                                                                                                       |  |           |           |                                               |                          |                          |                                 |                          |                          |                           |                          |                          |                                              |                          |                          |                           |                          |                          |                    |                          |                          |                         |                          |                          |                                                         |                          |                          |                             |                          |                          |                                               |                          |                          |                      |                          |                          |
| h. आँख की पारदर्शी झिल्ली पर सफेद दाग (Corneal Opacity) | <input type="checkbox"/>                                                                                                                                                                                                                                                                                                                                                                                                                                                                                                                                                                                                                                                                                                                                                                                                                                                                                                                                                                                                                                                                                                                                                                                                                                                                                                                                                                                                                                                                                                                                                                                                            | <input type="checkbox"/> |                                                                                                                                                                                                                                                                                                                       |  |           |           |                                               |                          |                          |                                 |                          |                          |                           |                          |                          |                                              |                          |                          |                           |                          |                          |                    |                          |                          |                         |                          |                          |                                                         |                          |                          |                             |                          |                          |                                               |                          |                          |                      |                          |                          |
| i. रतौंधी (Night Blindness)                             | <input type="checkbox"/>                                                                                                                                                                                                                                                                                                                                                                                                                                                                                                                                                                                                                                                                                                                                                                                                                                                                                                                                                                                                                                                                                                                                                                                                                                                                                                                                                                                                                                                                                                                                                                                                            | <input type="checkbox"/> |                                                                                                                                                                                                                                                                                                                       |  |           |           |                                               |                          |                          |                                 |                          |                          |                           |                          |                          |                                              |                          |                          |                           |                          |                          |                    |                          |                          |                         |                          |                          |                                                         |                          |                          |                             |                          |                          |                                               |                          |                          |                      |                          |                          |
| j. विटामिन 'A' की कमी (Vitamin A deficiency )           | <input type="checkbox"/>                                                                                                                                                                                                                                                                                                                                                                                                                                                                                                                                                                                                                                                                                                                                                                                                                                                                                                                                                                                                                                                                                                                                                                                                                                                                                                                                                                                                                                                                                                                                                                                                            | <input type="checkbox"/> |                                                                                                                                                                                                                                                                                                                       |  |           |           |                                               |                          |                          |                                 |                          |                          |                           |                          |                          |                                              |                          |                          |                           |                          |                          |                    |                          |                          |                         |                          |                          |                                                         |                          |                          |                             |                          |                          |                                               |                          |                          |                      |                          |                          |
| k. नखुना (Pterygium)                                    | <input type="checkbox"/>                                                                                                                                                                                                                                                                                                                                                                                                                                                                                                                                                                                                                                                                                                                                                                                                                                                                                                                                                                                                                                                                                                                                                                                                                                                                                                                                                                                                                                                                                                                                                                                                            | <input type="checkbox"/> |                                                                                                                                                                                                                                                                                                                       |  |           |           |                                               |                          |                          |                                 |                          |                          |                           |                          |                          |                                              |                          |                          |                           |                          |                          |                    |                          |                          |                         |                          |                          |                                                         |                          |                          |                             |                          |                          |                                               |                          |                          |                      |                          |                          |
| 4.                                                      | <p>What is the source of information about eye disease to you and your family members?<br/><b>(Multiple response possible)</b><br/>आपको एवं आपके परिवारजनों को आँखों की बिमारी संबंधी जानकारी कहाँ से मिलती है?<br/>(एक से अधिक उत्तर संभव है)</p>                                                                                                                                                                                                                                                                                                                                                                                                                                                                                                                                                                                                                                                                                                                                                                                                                                                                                                                                                                                                                                                                                                                                                                                                                                                                                                                                                                                  |                          | <p>a. स्वास्थ्य कार्यकर्ता (Health Worker)<br/>b. टेलीविजन (Television)<br/>c. समाचार पत्रों द्वारा/पम्पलेट्स (Newspaper/Pamphlets)<br/>d. रेडियो (Radio)<br/>e. पड़ोसी (Neighbours)<br/>f. रिश्तेदार/घर का सदस्य (Relatives/ family members)<br/>g. अन्य ( Any other source)<br/>h. कहीं से नहीं मिलती (Nowhere)</p> |  |           |           |                                               |                          |                          |                                 |                          |                          |                           |                          |                          |                                              |                          |                          |                           |                          |                          |                    |                          |                          |                         |                          |                          |                                                         |                          |                          |                             |                          |                          |                                               |                          |                          |                      |                          |                          |

|    |                                                                                                                                                                                                                                                                                                                               |                                                                                   |                                                                                                                                                                                                                                                                                                                                                                                                                                                                                  |
|----|-------------------------------------------------------------------------------------------------------------------------------------------------------------------------------------------------------------------------------------------------------------------------------------------------------------------------------|-----------------------------------------------------------------------------------|----------------------------------------------------------------------------------------------------------------------------------------------------------------------------------------------------------------------------------------------------------------------------------------------------------------------------------------------------------------------------------------------------------------------------------------------------------------------------------|
| 5. | <p>If case of any eye problem, whom do you consult first?<br/> <b>(Multiple response possible)</b><br/>         (If answer 'a' or 'b' in no then go to QNo. 9)</p> <p>आँख की समस्या होने पर आप पहले कहाँ जाते हैं?<br/> <b>(एक से अधिक उत्तर संभव है)</b><br/>         (यदि उत्तर 'a' या 'b' है तो प्रश्न सं० 7 पर जायें)</p> |                                                                                   | <p>a. निजी नेत्र विशेषज्ञ (Private eye specialist)<br/> b. सरकारी अस्पताल के नेत्र विशेषज्ञ के पास ( Eye specialist in govt. hospital)<br/> c. सामान्य डाक्टर/स्थानीय चिकित्सक (General Physician/ Local practitioner)<br/> d. सरकारी डिस्पेंसरी/प्राथमिक स्वास्थ्य केन्द्र ( Govt. dispensary/Primary health centre)<br/> e. हकीम/वैद्य/गैर पंजीकृत चिकित्सक ( Hakeem / Vaidh/ Non-registered practitioner)<br/> f. दवा की दुकान (Medical Store)<br/> g. अन्य ( Any other )</p> |
| 6. | <p>In case you do not go to an eye doctor for your eye problems, what are the various reasons?<br/> <b>(Multiple response possible)</b></p> <p>यदि आप या आपके परिवारजन नेत्र चिकित्सक को नहीं दिखाते हैं तो नेत्र चिकित्सक के पास नहीं पहुँचने के क्या-क्या कारण हैं?(एक से अधिक उत्तर संभव है)</p>                           |                                                                                   | <p>a. नेत्र चिकित्सक के विषय में अज्ञानता (Not aware)<br/> b. आँख का स्वास्थ्य महत्वपूर्ण नहीं है (Eye Health Not A Priority)<br/> a. अस्पताल जाने में समय बहुत लगता है (Hospital too far)<br/> b. इलाज से डर लगता है (Fear of treatment)<br/> c. स्थानीय चिकित्सक का उपचार संतोषजनक है (Treatment of Local doctors is satisfactory)<br/> d. आर्थिक कारण (Economic reasons)<br/> e. परिवारिक कारण (Family reasons)<br/> f. अन्य (Other reasons)</p>                              |
| 7. | <p>Have you ever used eye medicine on your own without consulting the doctor?<br/>         (If answer is 'No' then go to Q.No.-9)</p> <p>क्या आपने ने कभी नेत्र चिकित्सक के सलाह के बिना, आँखों की दवाई ली है?<br/>         (यदि उत्तर 'नहीं' है तो प्रश्न सं० 9 पर जायें)</p>                                                | <p>हाँ (Yes) <input type="checkbox"/>      नहीं (No) <input type="checkbox"/></p> |                                                                                                                                                                                                                                                                                                                                                                                                                                                                                  |
| 8. | <p>If "Yes" then for which eye problems, do you use eye medicine on your own without consulting the doctor?<br/> <b>(Multiple response possible)</b></p> <p>यदि हाँ तो आँख की कौन-कौन सी समस्या के लिये?</p>                                                                                                                  |                                                                                   | <p>a. आँखों का लाल होना ( Redness of eyes)<br/> b. आँखों से पानी आना ( Watering)<br/> c. आँख में किरकिरी पड़ना ( Foreign body sensation)<br/> d. नजर कमजोर होना ( Decreased vision)<br/> e. आँखों में दर्द ( Eye ache)</p>                                                                                                                                                                                                                                                       |

|     |                                                                                                                                                                                                                                                                           |       |                                                                                                                                                                                                                                               |
|-----|---------------------------------------------------------------------------------------------------------------------------------------------------------------------------------------------------------------------------------------------------------------------------|-------|-----------------------------------------------------------------------------------------------------------------------------------------------------------------------------------------------------------------------------------------------|
|     | (एक से अधिक उत्तर संभव है)                                                                                                                                                                                                                                                |       | f. आँखों में जलन ( Burning of eyes)<br>g. आँखों में खुजली ( Ocular itching)<br>h. आँखों की सफाई के लिए ( Cleaning of eyes)<br>i. मोतिया रोकने के लिए ( Stop cataract development)<br>j. आँखों का संक्रमण (Conjunctivitis)<br>k. अन्य ( Other) |
| 9.  | Is there any eye medicine available in your house?<br><b>(Multiple response possible)</b><br>(If answer is 'No' then to Q.No.-11)<br><br>क्या आप के घर में आँख संबंधी कोई दवा उपलब्ध है?<br>(एक से अधिक उत्तर संभव है)<br>(यदि उत्तर 'नहीं' है तो प्रश्न सं० 11 पर जायें) |       | a. दवाई नहीं है/मान्य नहीं है (Not Applicable)<br>b. Steroid<br>c. गुलाब जल (Rose Water)<br>d. अन्य (Other)                                                                                                                                   |
| 10. | What is the expiry date of the medicine?<br>दवा की Expiry Date क्या है ?                                                                                                                                                                                                  | _____ | a. दवा Expired है (Medicine is beyond expiry date)<br>b. दवा Expired नहीं है (Medicine has not expired)<br>c. दवा की Expiry Date उपलब्ध नहीं है (Expiry date not available)                                                                   |
| 11. | In case of eye problems, do you apply anything beyond the eye medicine (TEM)? <b>(Multiple response possible)</b><br><br>आँख की समस्या होने पर, क्या आप दवा के अतिरिक्त कुछ और इस्तेमाल करते हैं ? (उल्लेख करें)<br>(एक से अधिक उत्तर संभव है)                            |       | a. दुध (milk)<br>b. नारियल का तेल ( coconut oil)<br>c. घी ( ghee)<br>d. शहद ( honey)<br>e. खाजल/सुरमा ( kajal)<br>f. हल्दी ( turmeric paste)<br>g. नीम/नीम का लेप ( neem)<br>h. अन्य ( other)<br>i. कुछ नहीं ( nothing)                       |
| 12. | In case of trauma to the eye, when do you think you should seek advice from the eye doctor?<br>यदि आँख में चोट लगती है, तो आप के अनुसार नेत्र चिकित्सक की सलाह कितने समय में लेनी चाहिए ?                                                                                 | _____ | a. तुरन्त ( Immediately )<br>b. 0-6 घंटे (0-6 hours)<br>c. 7-24 घंटे (7-24 hours)<br>d. 1-7 दिन (1-7 hours)<br>e. किसी भी समय ( Anytime)<br>f. आवश्यकतानुसार ( As per requirement)<br>g. नहीं मालूम ( Do not know)                            |

|     |                                                                                                                                                                                                             |                                                               |                                                                                                                                                                                                                                                                                                                                                                                                            |                          |
|-----|-------------------------------------------------------------------------------------------------------------------------------------------------------------------------------------------------------------|---------------------------------------------------------------|------------------------------------------------------------------------------------------------------------------------------------------------------------------------------------------------------------------------------------------------------------------------------------------------------------------------------------------------------------------------------------------------------------|--------------------------|
| 13. | <p>Can the following things cause of injury to the eye?<br/>         क्या इन वस्तुओं से आँखों को नुकसान हो सकता है ?</p>                                                                                    | <p>हाँ (Yes)      नहीं (No)      नहीं मालूम (Do not know)</p> |                                                                                                                                                                                                                                                                                                                                                                                                            |                          |
|     | a. आँख में गुलाब जल डालने से (Gulabjal)                                                                                                                                                                     | <input type="checkbox"/>                                      | <input type="checkbox"/>                                                                                                                                                                                                                                                                                                                                                                                   | <input type="checkbox"/> |
|     | b. आँख में चूना गिरने से (Chuna injury)                                                                                                                                                                     | <input type="checkbox"/>                                      | <input type="checkbox"/>                                                                                                                                                                                                                                                                                                                                                                                   | <input type="checkbox"/> |
|     | c. आँख में होली के रंग गिरने से (Holi colors )                                                                                                                                                              | <input type="checkbox"/>                                      | <input type="checkbox"/>                                                                                                                                                                                                                                                                                                                                                                                   | <input type="checkbox"/> |
|     | d. पटाखे की चोट से (Fire cracker injury)                                                                                                                                                                    | <input type="checkbox"/>                                      | <input type="checkbox"/>                                                                                                                                                                                                                                                                                                                                                                                   | <input type="checkbox"/> |
|     | e. आँखों में तेजाब, फिनाईल पड़ने से (Acid & Phenyl injury)                                                                                                                                                  | <input type="checkbox"/>                                      | <input type="checkbox"/>                                                                                                                                                                                                                                                                                                                                                                                   | <input type="checkbox"/> |
| 14. | <p>In case of minor trauma with vegetative matter, do you consult an eye doctor?<br/>         फसल/खेत संबंधी कार्य करते समय अगर आँख में छोटी चोट या खरोंच लगती है तो क्या आप डाक्टर से संपर्क करते हैं?</p> |                                                               | <p>a. हाँ (Yes)<br/>         b. नहीं (No)<br/>         c. फसल/खेत संबंधी कार्य नहीं करते हैं ( Not involved in agricultural work)</p>                                                                                                                                                                                                                                                                      |                          |
| 15. | <p>Do you know that deficiency of Vitamin 'A' mostly affects which age group?<br/>         क्या आप जानते हैं, विटामिन 'A' की कमी किस उम्र को अधिकतर प्रभावित करती है?</p>                                   | <p>_____</p>                                                  | <p>a. 0-6 वर्ष में (0-6 years)<br/>         b. गर्भवती महिलाओं में (Pregnant females)<br/>         c. अन्य (Others)<br/>         d. नहीं मालूम (Do not know)</p>                                                                                                                                                                                                                                           |                          |
| 16. | <p>Can you tell us about the sources of vitamin 'A' in our diet?<br/>         हमारे आहार में विटामिन 'A' के क्या-क्या स्रोत हैं?</p>                                                                        |                                                               | <p>a. हरी पत्तेदार सब्जियाँ ( Green vegetables )<br/>         b. पीले और नारंगी फल जैसे –पपीता, आम, कद्दू ( Yellow and orange fruits for example- papaya, mango, pumpkin)<br/>         c. दुध (Milk)<br/>         d. दाल (Pulses)<br/>         e. अंडा (Egg)<br/>         f. आलू (Potato)<br/>         g. मांस/मछली (Meat/Fish)<br/>         h. अन्य (Others)<br/>         i. नहीं मालूम (Do not know)</p> |                          |
| 17. | <p>When is the immunization for measles administered?<br/>         खसरे का टीका कब लगाया जाता है?</p>                                                                                                       |                                                               | <p>a. 0-9 महीने में (0-9 months)<br/>         b. 10-12 महीने में (10-12 months )<br/>         c. 1-5 वर्ष में (1-5 years)<br/>         d. अन्य (Other)<br/>         e. नहीं मालूम (Do not know)</p>                                                                                                                                                                                                        |                          |

|     |                                                                                                                                                                                                                                                                        |                                                                                   |                                                                                                                                                                                                                                                                                                                                                                                                                                                                                                                                                                                                                                           |
|-----|------------------------------------------------------------------------------------------------------------------------------------------------------------------------------------------------------------------------------------------------------------------------|-----------------------------------------------------------------------------------|-------------------------------------------------------------------------------------------------------------------------------------------------------------------------------------------------------------------------------------------------------------------------------------------------------------------------------------------------------------------------------------------------------------------------------------------------------------------------------------------------------------------------------------------------------------------------------------------------------------------------------------------|
| 18. | <p>Have you ever heard about eye donation?<br/> <b>(If answer is 'No', then interview is over)</b><br/>         क्या आपने कभी आँख दान (नेत्रदान) के बारे में सुना है?<br/>         (यदि उत्तर 'नहीं' है तो आगे के प्रश्नों को नहीं पूछें, साक्षत्कार समाप्त करें )</p> | <p>हाँ (Yes) <input type="checkbox"/>      नहीं (No) <input type="checkbox"/></p> |                                                                                                                                                                                                                                                                                                                                                                                                                                                                                                                                                                                                                                           |
| 19. | <p>When should eyes be donated? (If answer is not 'b' then go to QNo. 21)<br/>         क्या आप जानते हैं कि आँख दान कब किया जाता है?<br/>         (उल्लेख करें )<br/>         (यदि उत्तर 'b' नहीं है तो प्रश्न सं० 21 पर जाये )</p>                                    |                                                                                   | <p>a. मृत्यु के पहले ( Before death)<br/>         b. मृत्यु के बाद ( After death)<br/>         c. किसी भी उम्र में ( Any age)<br/>         d. अन्य (Other)<br/>         e. नहीं मालूम ( Do not know)</p>                                                                                                                                                                                                                                                                                                                                                                                                                                  |
| 20. | <p>Do you know that till what time after death can eyes be donated and used?<br/>         क्या आप जानते हैं कि मृत्यु के बाद आँख दान कितने समय के अन्दर करनी चाहिये?</p>                                                                                               |                                                                                   | <p>a. 0-6 घंटे में ( within 0-6 hours)<br/>         b. 7-24 घंटे में ( between 7-24 hours)<br/>         c. 24 घंटे से अधिक समय (&gt;24 hours)<br/>         d. कभी भी ( Anytime)<br/>         e. नहीं मालूम ( Do not know)</p>                                                                                                                                                                                                                                                                                                                                                                                                             |
| 21. | <p>According to you, why don't people donate their eyes?<br/> <b>(Multiple response possible)</b><br/>         आप के अनुसार लोग, आँख दान क्यों नहीं करते हैं?<br/>         (एक से अधिक उत्तर संभव हैं)</p>                                                             |                                                                                   | <p>a. अज्ञानता ( Lack of awareness)<br/>         b. रिश्तेदारों द्वारा आपत्ति ( Objection by relatives)<br/>         c. समय का अभाव ( Paucity of time)<br/>         d. धार्मिक मान्यता ( Religious beliefs)<br/>         e. शरीर की बनावट खराब हो जाती है/शरीर से आँखों को अलग करना अस्वीकार ( disfigurement of body)<br/>         f. कानूनी समस्या ( Legal problems)<br/>         g. आँख दान करने से मरने वाले की आत्मा को शान्ति नहीं मिलती (Soul does not rest in peace)<br/>         h. आँखें या शरीर अस्वस्थ होने की वजह से ( Eye or body is unhealthy)<br/>         i. अन्य ( Other )<br/>         j. नहीं मालूम ( Do not know)</p> |
| 22. | <p>Do you know what kind of blindness can be corrected by corneal transplantation?<br/>         क्या आप जानते हैं कि आँख दान के द्वारा किस प्रकार की अंधता को दूर किया जा सकता है?</p>                                                                                 |                                                                                   | <p>a. पुतली पर सफेद दाग ( Corneal opacity)<br/>         b. काला मोतिया ( Glaucoma)<br/>         c. सफेद मोतिया ( Cataract)<br/>         d. आँख के परदे की बीमारी ( Retinal disease/ detachment)<br/>         e. जन्मजात अंधापन ( Congenital blindness since birth)<br/>         f. अन्य ( Other)<br/>         g. नहीं मालूम ( Do not know)</p>                                                                                                                                                                                                                                                                                            |

|                                                         |                                                                                                                                                           |
|---------------------------------------------------------|-----------------------------------------------------------------------------------------------------------------------------------------------------------|
| <p>Status of Interview</p> <p>साक्षात्कार की स्थिति</p> | <p>1.Completed interview ( पूर्ण साक्षात्कार)</p> <p>2.Incomplete interview ( अपूर्ण साक्षात्कार)</p> <p>66.Others (Specify) अन्य (उल्लेख करें )_____</p> |
|---------------------------------------------------------|-----------------------------------------------------------------------------------------------------------------------------------------------------------|

Signature of Interviewer:

Name of Interviewer:
